# Supplementary material for: Randomized Clinical Trial of an Internet-Based Adolescent Depression Prevention Intervention in Primary Care: Internalizing Symptom Outcomes
Source: PubMed Central journal article supplement (PMC7660174; doi:10.3390/ijerph17217736), 2020-10-22
Supplement: ijerph-17-07736-s001.pdf [file ijerph-17-07736-s001.pdf]

**Table S1.** Predictors<sup>1</sup> of missing 24-month CES-D<sub>10</sub>, all participants.

|                                                       | <b>OR</b> | <b>(CI)</b> |        | <b>b</b> | <b>p</b> |
|-------------------------------------------------------|-----------|-------------|--------|----------|----------|
| Intercept                                             | --        |             |        | -4.098   | 0.002    |
| Boston (ref=Chicago)                                  | 0.546     | (0.328      | 0.911) | -0.604   | 0.02     |
| CATCH-IT (ref=HealthEd)                               | 2.307     | (1.457      | 3.651) | 0.836    | <0.001   |
| Age at baseline, y                                    | 1.196     | (1.026      | 1.393) | 0.179    | 0.02     |
| Male (ref=female)                                     | 1.528     | (0.936      | 2.494) | 0.424    | 0.09     |
| Hispanic (ref=non-Hisp)                               | 1.107     | (0.609      | 2.010) | 0.101    | 0.74     |
| Non-white (ref=white)                                 | 0.834     | (0.505      | 1.376) | -0.182   | 0.48     |
| Mother's education (ref=college graduate)             |           |             |        |          |          |
| HS graduate/GED or less                               | 3.274     | (1.611      | 6.654) | 1.186    | 0.001    |
| Some college                                          | 0.932     | (0.525      | 1.654) | -0.071   | 0.81     |
| Parents' marital status (ref=married)                 |           |             |        |          |          |
| Never married                                         | 0.994     | (0.496      | 1.991) | -0.006   | 0.99     |
| Divorced, separated, widowed                          | 0.857     | (0.480      | 1.531) | -0.154   | 0.60     |
| Firstborn child (ref=not firstborn)                   | 1.545     | (0.971      | 2.458) | 0.435    | 0.07     |
| Past episode at baseline (ref=no past episode)        | 1.169     | (0.705      | 1.939) | 0.156    | 0.55     |
| High CESD at screening or baseline (ref=no high CESD) | 2.206     | (1.035      | 4.700) | 0.791    | 0.04     |

<sup>a</sup> From logistic regression model. Some observations were excluded from the model due to missing data for covariates: N=353.

**Table S2.** Predictors<sup>1</sup> of missing 24-month SCARED, all participants.

|                                                       | <b>OR</b> | <b>(CI)</b> |        | <b>b</b> | <b>p</b> |
|-------------------------------------------------------|-----------|-------------|--------|----------|----------|
| Intercept                                             | --        |             |        | 0.164    | 0.92     |
| Boston (ref=Chicago)                                  | 0.142     | (0.078      | 0.260) | -1.952   | <0.001   |
| CATCH-IT (ref=HealthEd)                               | 1.852     | (1.066      | 3.218) | 0.616    | 0.03     |
| Age at baseline, y                                    | 1.044     | (0.865      | 1.259) | 0.043    | 0.66     |
| Male (ref=female)                                     | 0.971     | (0.541      | 1.743) | -0.030   | 0.92     |
| Hispanic (ref=non-Hisp)                               | 1.410     | (0.625      | 3.180) | 0.344    | 0.41     |
| Non-white (ref=white)                                 | 0.768     | (0.411      | 1.433) | -0.265   | 0.41     |
| Mother's education (ref=college graduate)             |           |             |        |          |          |
| HS graduate/GED or less                               | 2.667     | (1.059      | 6.719) | 0.981    | 0.04     |
| Some college                                          | 1.140     | (0.564      | 2.305) | 0.131    | 0.72     |
| Parents' marital status (ref=married)                 |           |             |        |          |          |
| Never married                                         | 0.634     | (0.269      | 1.497) | -0.456   | 0.30     |
| Divorced, separated, widowed                          | 0.791     | (0.388      | 1.612) | -0.234   | 0.52     |
| Firstborn child (ref=not firstborn)                   | 1.422     | (0.802      | 2.519) | 0.352    | 0.23     |
| Past episode at baseline (ref=no past episode)        | 1.369     | (0.721      | 2.601) | 0.314    | 0.34     |
| High CESD at screening or baseline (ref=no high CESD) | 1.908     | (0.829      | 4.387) | 0.646    | 0.13     |

<sup>1</sup> From logistic regression model. Some observations were excluded from the model due to missing data for covariates: N=353.

**Table S3.** SCARED Moderator: Between-Group Comparisons: difference between CATCH-IT and HE simple slopes for time at selected levels of Parent CES-D<sup>1</sup>.

| Parent CES-D <sub>10</sub> |                | Beta   | SE    | p-value |
|----------------------------|----------------|--------|-------|---------|
| 0.0                        | Difference     | 0.284  | 0.130 | 0.03    |
|                            | CATCH-IT slope | 0.037  | 0.092 | 0.69    |
|                            | HE slope       | -0.247 | 0.092 | 0.007   |
| 3.0                        | Difference     | 0.143  | 0.097 | 0.142   |
|                            | CATCH-IT slope | -0.037 | 0.070 | 0.6017  |
|                            | HE slope       | -0.180 | 0.067 | 0.008   |
| 5.6                        | Difference     | 0.021  | 0.083 | 0.80    |
|                            | CATCH-IT slope | -0.100 | 0.060 | 0.09    |
|                            | HE slope       | -0.122 | 0.057 | 0.03    |
| 9.0                        | Difference     | -0.139 | 0.094 | 0.14    |
|                            | CATCH-IT slope | -0.364 | 0.117 | 0.002   |
|                            | HE slope       | -0.225 | 0.083 | 0.007   |
| 27.0                       | Difference     | -0.984 | 0.348 | 0.005   |
|                            | CATCH-IT slope | -0.625 | 0.229 | 0.007   |
|                            | HE slope       | 0.359  | 0.262 | 0.17    |

<sup>1</sup> Parent CES-D<sub>10</sub> values shown are close to the minimum, the 25<sup>th</sup>, 50<sup>th</sup>, and 75<sup>th</sup> percentiles, and the maximum for this sample.

**Table S4.** SCARED Moderator: Between-Group Comparisons: difference between CATCH-IT and HE simple slopes for time at selected levels of PRPC<sup>1</sup>.

| PRPC score |                | Beta   | SE    | p-value |
|------------|----------------|--------|-------|---------|
| 1.0        | Difference     | 1.248  | 0.482 | 0.01    |
|            | CATCH-IT slope | 0.197  | 0.367 | 0.59    |
|            | HE slope       | -1.052 | 0.312 | <0.001  |
| 3.6        | Difference     | 0.179  | 0.138 | 0.20    |
|            | CATCH-IT slope | -0.074 | 0.100 | 0.46    |
|            | HE slope       | -0.252 | 0.095 | 0.008   |
| 4.0        | Difference     | 0.014  | 0.124 | 0.91    |
|            | CATCH-IT slope | -0.116 | 0.086 | 0.18    |
|            | HE slope       | -0.130 | 0.090 | 0.15    |
| 4.6        | Difference     | -0.233 | 0.157 | 0.14    |
|            | CATCH-IT slope | -0.178 | 0.109 | 0.10    |
|            | HE slope       | 0.055  | 0.114 | 0.63    |
| 5.0        | Difference     | -0.398 | 0.202 | 0.05    |
|            | CATCH-IT slope | -0.220 | 0.143 | 0.12    |
|            | HE slope       | 0.178  | 0.143 | 0.21    |

<sup>1</sup> PRPC values shown are close to the minimum, the 25<sup>th</sup>, 50<sup>th</sup>, and 75<sup>th</sup> percentiles, and the maximum for this sample.

**Table S5.** CES-D<sub>10</sub> Moderator: Between-Group Comparisons: difference between CATCH-IT and HE simple slopes for time at selected levels of ADHD<sup>1</sup>.

| <b>ADHD score</b> | <b>Beta</b> | <b>SE</b> | <b>p-value</b> |
|-------------------|-------------|-----------|----------------|
| 0.00 Difference   | -1.198      | 0.432     | 0.006          |
| CATCH-IT slope    | -0.308      | 0.285     | 0.28           |
| HE slope          | 0.891       | 0.325     | 0.006          |
| 0.50 Difference   | -0.489      | 0.243     | 0.04           |
| CATCH-IT slope    | -0.247      | 0.160     | 0.12           |
| HE slope          | 0.243       | 0.183     | 0.19           |
| 0.75 Difference   | -0.135      | 0.198     | 0.50           |
| CATCH-IT slope    | -0.216      | 0.135     | 0.11           |
| HE slope          | -0.081      | 0.145     | 0.58           |
| 1.00 Difference   | 0.220       | 0.221     | 0.32           |
| CATCH-IT slope    | -0.185      | 0.155     | 0.23           |
| HE slope          | -0.405      | 0.157     | 0.01           |
| 2.00 Difference   | 1.637       | 0.616     | 0.008          |
| CATCH-IT slope    | -0.063      | 0.428     | 0.88           |
| HE slope          | -1.700      | 0.443     | <0.001         |

<sup>1</sup> ADHD values shown are close to the minimum, the 25<sup>th</sup>, 50<sup>th</sup>, and 75<sup>th</sup> percentiles, and the maximum for this sample.

**Table S6.** CES-D<sub>10</sub> Moderator: Between-Group Comparisons: difference between CATCH-IT and HE simple slopes for time at selected levels of ODCD<sup>1</sup>.

| <b>ODCD score</b> | <b>Beta</b> | <b>SE</b> | <b>p-value</b> |
|-------------------|-------------|-----------|----------------|
| 0.00 Difference   | -0.669      | 0.300     | 0.03           |
| CATCH-IT slope    | -0.294      | 0.190     | 0.12           |
| HE slope          | 0.375       | 0.233     | 0.11           |
| 0.09 Difference   | -0.455      | 0.246     | 0.06           |
| CATCH-IT slope    | -0.259      | 0.154     | 0.09           |
| HE slope          | 0.196       | 0.191     | 0.31           |
| 0.17 Difference   | -0.265      | 0.213     | 0.21           |
| CATCH-IT slope    | -0.229      | 0.138     | 0.10           |
| HE slope          | 0.037       | 0.163     | 0.82           |
| 0.35 Difference   | 0.162       | 0.229     | 0.48           |
| CATCH-IT slope    | -1.454      | 0.454     | 0.002          |
| HE slope          | -1.615      | 0.490     | 0.001          |
| 1.25 Difference   | 2.297       | 0.958     | 0.02           |
| CATCH-IT slope    | 0.184       | 0.708     | 0.80           |
| HE slope          | -2.113      | 0.646     | 0.001          |

<sup>1</sup> ODCD values shown are close to the minimum, the 25<sup>th</sup>, 50<sup>th</sup>, and 75<sup>th</sup> percentiles, and the maximum for this sample.

**Table S7.** CES-D<sub>10</sub> Moderator: Between-Group Comparisons: difference between CATCH-IT and HE simple slopes for time at selected levels of PRPC<sup>1</sup>.

|     | <b>PRPC score</b> | <b>Beta</b> | <b>SE</b> | <b>p-value</b> |
|-----|-------------------|-------------|-----------|----------------|
| 1.0 | Difference        | 1.974       | 0.910     | 0.03           |
|     | CATCH-IT slope    | 0.756       | 0.701     | 0.28           |
|     | HE slope          | -1.218      | 0.580     | 0.04           |
| 3.6 | Difference        | 0.427       | 0.256     | 0.10           |
|     | CATCH-IT slope    | -0.149      | 0.184     | 0.42           |
|     | HE slope          | -0.576      | 0.178     | 0.001          |
| 4.0 | Difference        | 0.188       | 0.232     | 0.42           |
|     | CATCH-IT slope    | -0.289      | 0.158     | 0.07           |
|     | HE slope          | -0.477      | 0.171     | 0.005          |
| 4.6 | Difference        | -0.169      | 0.300     | 0.57           |
|     | CATCH-IT slope    | -1.387      | 0.721     | 0.06           |
|     | HE slope          | -1.218      | 0.580     | 0.04           |
| 5.0 | Difference        | -0.407      | 0.386     | 0.29           |
|     | CATCH-IT slope    | -0.637      | 0.274     | 0.02           |
|     | HE slope          | -0.230      | 0.272     | 0.40           |

<sup>1</sup> PRPC values shown are close to the minimum, the 25<sup>th</sup>, 50<sup>th</sup>, and 75<sup>th</sup> percentiles, and the maximum for this sample.
